# Supplementary material
Source: Springer Nature journal article supplement (https://www.springermedizin.de/resource/supplementary/12974_2013_941_MOESM9_ESM.pdf/9600450)

**VP-16**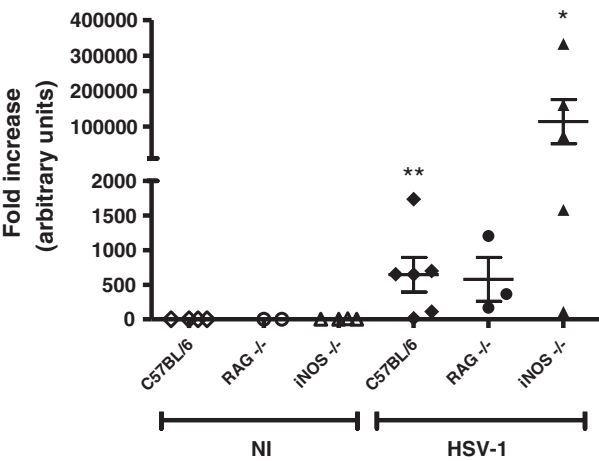**iNOS**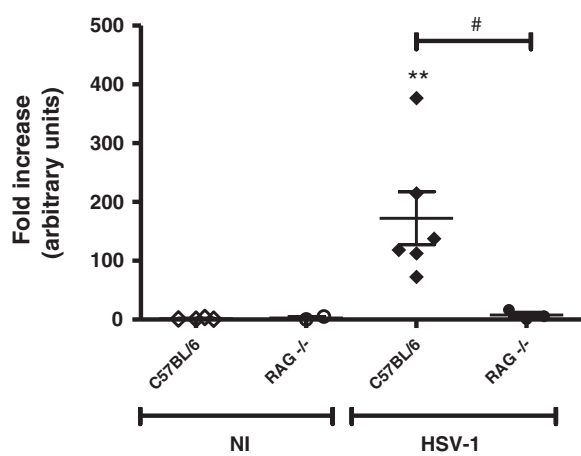**TNF  $\alpha$** 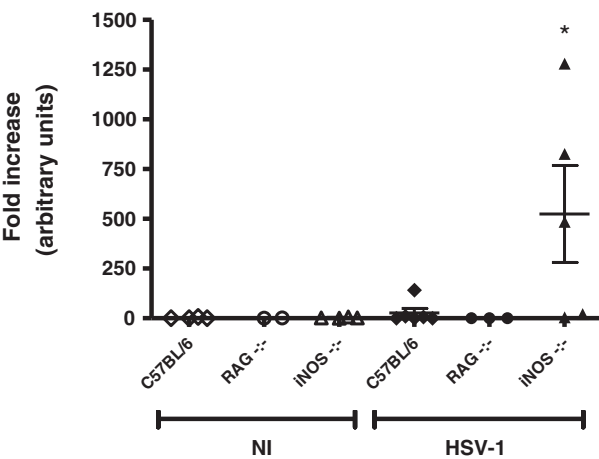**MCP-1**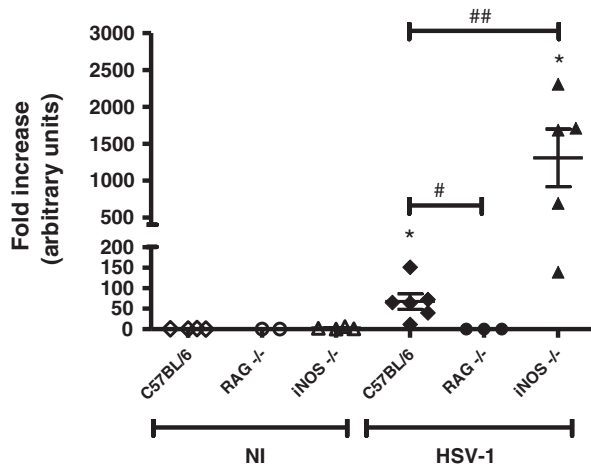**Rantes**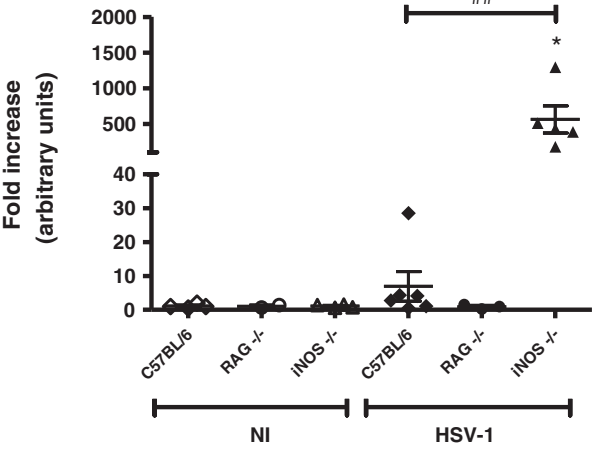**IP-10**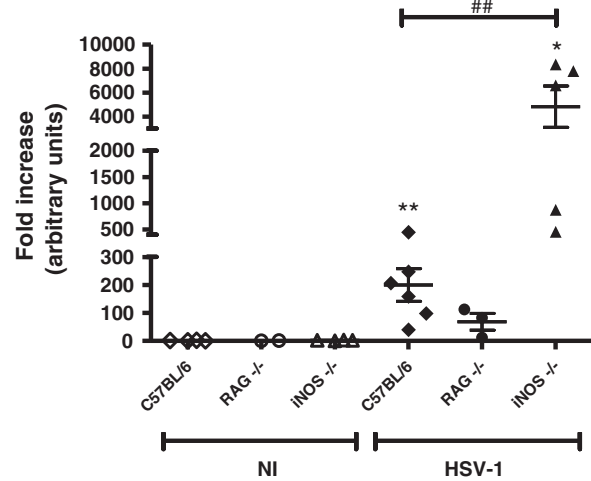

Supplement: MOESM9 [file 9600450]
